# Supplementary material for: A Matched Molecular and Clinical Analysis of the Epithelioid Haemangioendothelioma Cohort in the Stafford Fox Rare Cancer Program and Contextual Literature Review
Source: Cancers (Basel). 2023 Sep 1;15(17):4378. doi: 10.3390/cancers15174378 (PMC10487006; doi:10.3390/cancers15174378)
Supplement: Supplementary file 1 [file cancers-15-04378-s001.zip › Abdelmogod et al_Supp Table S1 1.xlsx]

## Sheet: Sheet1
Supplementary Table S1: Details of fusion genes identified using the TruSight Fusion Panel or WGS
ID	#gene1	gene2	breakpoint1	breakpoint2	site1	site2	type	split_reads1	split_reads2	discordant_mates	confidence	transcript_id1	transcript_id2
#154	WWTR1	CAMTA1	3:149290651	1:7721786	CDS/splice-site	CDS/splice-site	translocation	4	4	1	high	ENST00000465804	ENST00000303635
#368	WWTR1	CAMTA1	3:149276392	1:7723933	intron	CDS	translocation	0	1	3	medium	.	ENST00000303635
#455	WWTR1	CAMTA1	3:149290651	1:7721786	CDS/splice-site	CDS/splice-site	translocation	11	19	42	high	ENST00000465804	ENST00000303635
#503	FBN1	WWTR1	15:48936803	3:149290787	CDS/splice-site	CDS/splice-site	translocation	0	63	28	high	ENST00000316623	ENST00000465804
#503	WWTR1	CAMTA1	3:149374663	1:7723711	CDS/splice-site	CDS	translocation	1	9	13	high	ENST00000465804	ENST00000303635
#521	WWTR1	CAMTA1	3:149290651	1:7723746	CDS/splice-site	CDS	translocation	0	3	0	medium	ENST00000465804	ENST00000303635
#130	CBX3	HECW1	7:26208555	7:43479610	CDS/splice-site	CDS/splice-site	translocation	8	15	6	high	ENST00000396386	ENST00000453890
#130	YAP1	TFE3	11:101983686	X:48896661	CDS/splice-site	CDS	translocation	10	1	2	high	ENST00000282441.5	ENST00000315869.7
